# Supplementary material for: Linear Aminolipids with Moderate Antimicrobial Activity from the Antarctic Gram-Negative Bacterium Aequorivita sp
Source: PubMed Central journal article supplement (PMC6025266; doi:10.3390/md16060187), 2018-05-28

## SUPPLEMENTARY MATERIALS

### Linear Aminolipids with Moderate Antimicrobial Activity from the Antarctic Gram-Negative Bacterium *Aequorivita* sp.

Giuseppina Chianese<sup>1</sup>, Fortunato Palma Esposito<sup>2</sup>, Delphine Parrot<sup>1</sup>, Colin Ingham<sup>3</sup>, Donatella de Pascale<sup>2</sup> and Deniz Tasdemir<sup>1,4,\*</sup>

<sup>1</sup> GEOMAR Centre for Marine Biotechnology (GEOMAR-Biotech), Research Unit Marine Natural Products Chemistry, GEOMAR Helmholtz Centre for Ocean Research Kiel, Am Kiel-Kanal 44, Kiel 24106, Germany; g.chianese@unina.it; dparrot@geomar.de; dtasdemir@geomar.de

<sup>2</sup> Institute of Protein Biochemistry, National Research Council, Via P. Castellino, 111, I-80131 Naples, Italy; f.palma@ibp.cnr.it; d.depascale@ibp.cnr.it

<sup>3</sup> Hoekmine BV, Utrecht 3584 CS, The Netherlands; colinutrecht@gmail.com

<sup>4</sup> Kiel University, Christian-Albrechts-Platz 4, 24118, Kiel, Germany

\* Correspondence: dtasdemir@geomar.de; Tel.: +49-431-600-4430

| <b><u>Figure No</u></b>                                                                             | <b><u>Page No</u></b> |
|-----------------------------------------------------------------------------------------------------|-----------------------|
| <b>Figure S1.</b> <sup>1</sup> H NMR (600 MHz, CDCl <sub>3</sub> ) spectrum of compound <b>1</b>    | <b>3</b>              |
| <b>Figure S2.</b> COSY NMR (600 MHz, CDCl <sub>3</sub> ) spectrum of compound <b>1</b>              | <b>3</b>              |
| <b>Figure S3.</b> HMBC NMR (600 MHz, CDCl <sub>3</sub> ) spectrum of compound <b>1</b>              | <b>4</b>              |
| <b>Figure S4.</b> HSQC NMR (600 MHz, CDCl <sub>3</sub> ) spectrum of compound <b>1</b>              | <b>4</b>              |
| <b>Figure S5.</b> HRESIMS/MS spectrum in positive mode of compound <b>1</b>                         | <b>5</b>              |
| <b>Figure S6.</b> <sup>1</sup> H NMR (600 MHz, CDCl <sub>3</sub> ) spectrum of compound <b>2</b>    | <b>6</b>              |
| <b>Figure S7.</b> <sup>13</sup> C NMR (150 MHz, CDCl <sub>3</sub> ) spectrum of compound <b>2</b>   | <b>6</b>              |
| <b>Figure S8.</b> COSY NMR (600 MHz, CDCl <sub>3</sub> ) spectrum of compound <b>2</b>              | <b>7</b>              |
| <b>Figure S9.</b> HMBC NMR (600 MHz, CDCl <sub>3</sub> ) spectrum of compound <b>2</b>              | <b>7</b>              |
| <b>Figure S10.</b> HSQC NMR (600 MHz, CDCl <sub>3</sub> ) spectrum of compound <b>2</b>             | <b>8</b>              |
| <b>Figure S11.</b> NOESY NMR (600 MHz, CDCl <sub>3</sub> ) spectrum of compound <b>2</b>            | <b>8</b>              |
| <b>Figure S12.</b> HRESIMS and MS/MS spectra in positive mode of compound <b>2</b>                  | <b>9</b>              |
| <b>Figure S13.</b> <sup>1</sup> H NMR (600 MHz, CDCl <sub>3</sub> ) spectrum of compound <b>3</b>   | <b>10</b>             |
| <b>Figure S14.</b> <sup>13</sup> C NMR (150 MHz, CDCl <sub>3</sub> ) spectrum of compound <b>3</b>  | <b>10</b>             |
| <b>Figure S15.</b> COSY NMR (600 MHz, CDCl <sub>3</sub> ) spectrum of compound <b>3</b>             | <b>11</b>             |
| <b>Figure S16.</b> HMBC NMR (600 MHz, CDCl <sub>3</sub> ) spectrum of compound <b>3</b>             | <b>11</b>             |
| <b>Figure S17.</b> HSQC NMR (600 MHz, CDCl <sub>3</sub> ) spectrum of compound <b>3</b>             | <b>12</b>             |
| <b>Figure S18.</b> NOESY NMR (600 MHz, CDCl <sub>3</sub> ) spectrum of compound <b>3</b>            | <b>12</b>             |
| <b>Figure S19.</b> HRESIMS and MS/MS spectra in positive mode of compound <b>3</b>                  | <b>13</b>             |
| <b>Figure S20.</b> Annotated HRESI-MS/MS spectra in positive mode of the known compounds <b>4-7</b> | <b>14-15</b>          |

**Figure S1.**  $^1\text{H}$  NMR (600 MHz,  $\text{CDCl}_3$ ) spectrum of compound **1**

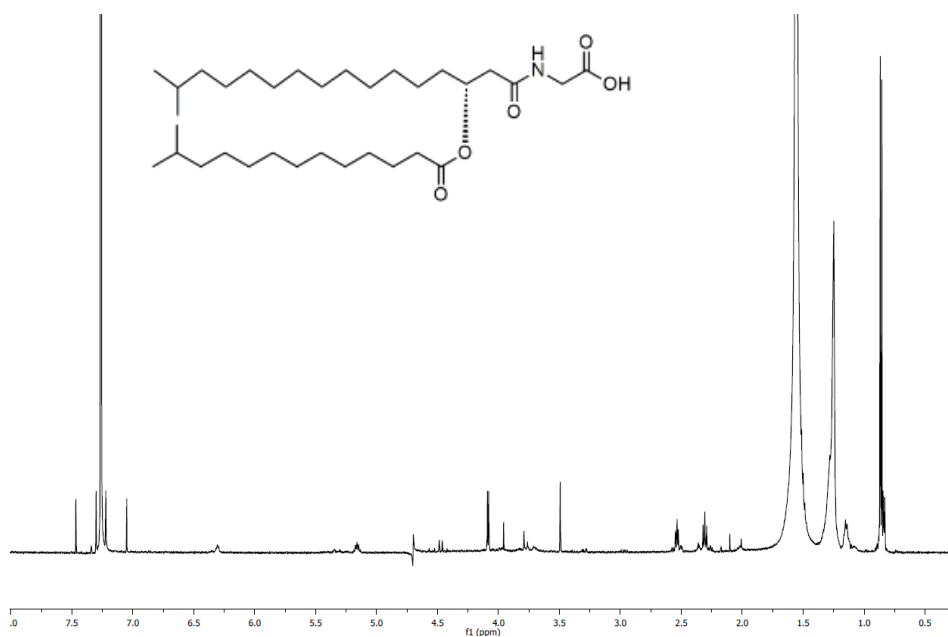

**Figure S2.** COSY NMR (600 MHz,  $\text{CDCl}_3$ ) spectrum of compound **1**

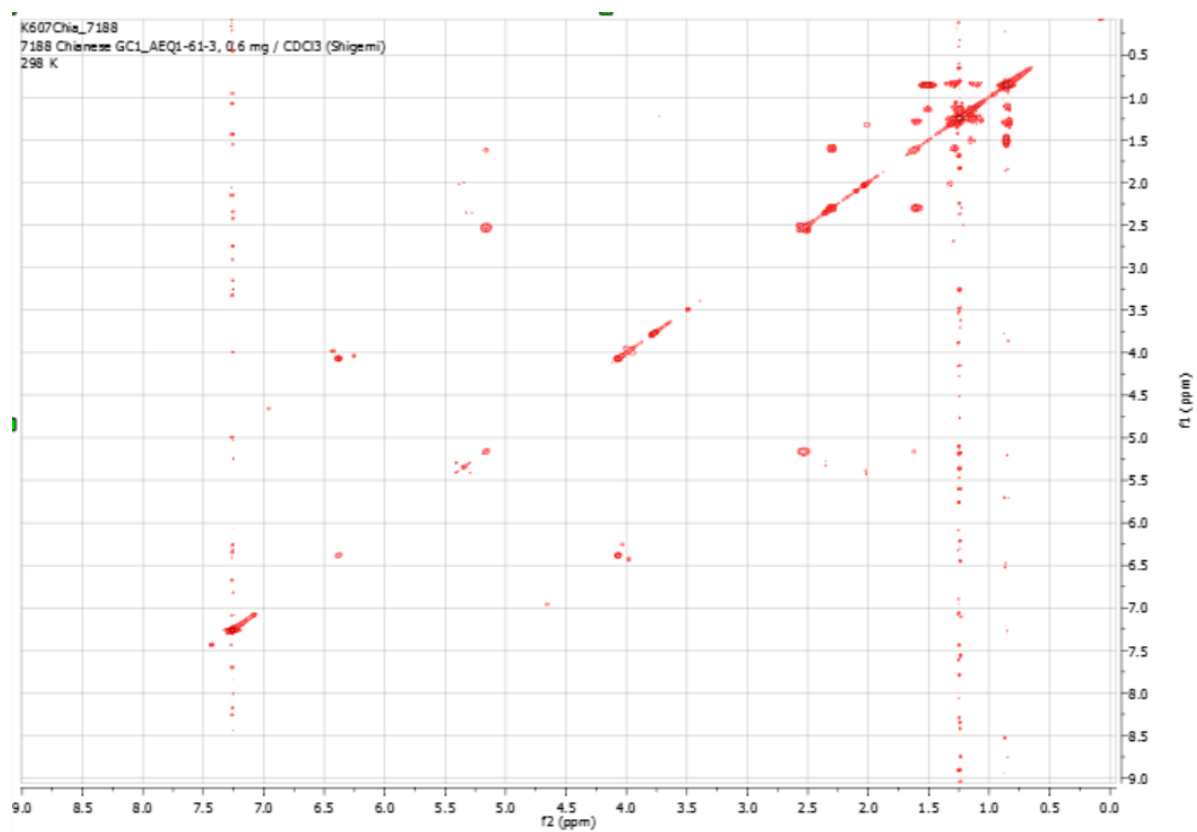

**Figure S3.** HMBC NMR (600 MHz, CDCl<sub>3</sub>) spectrum of compound **1**

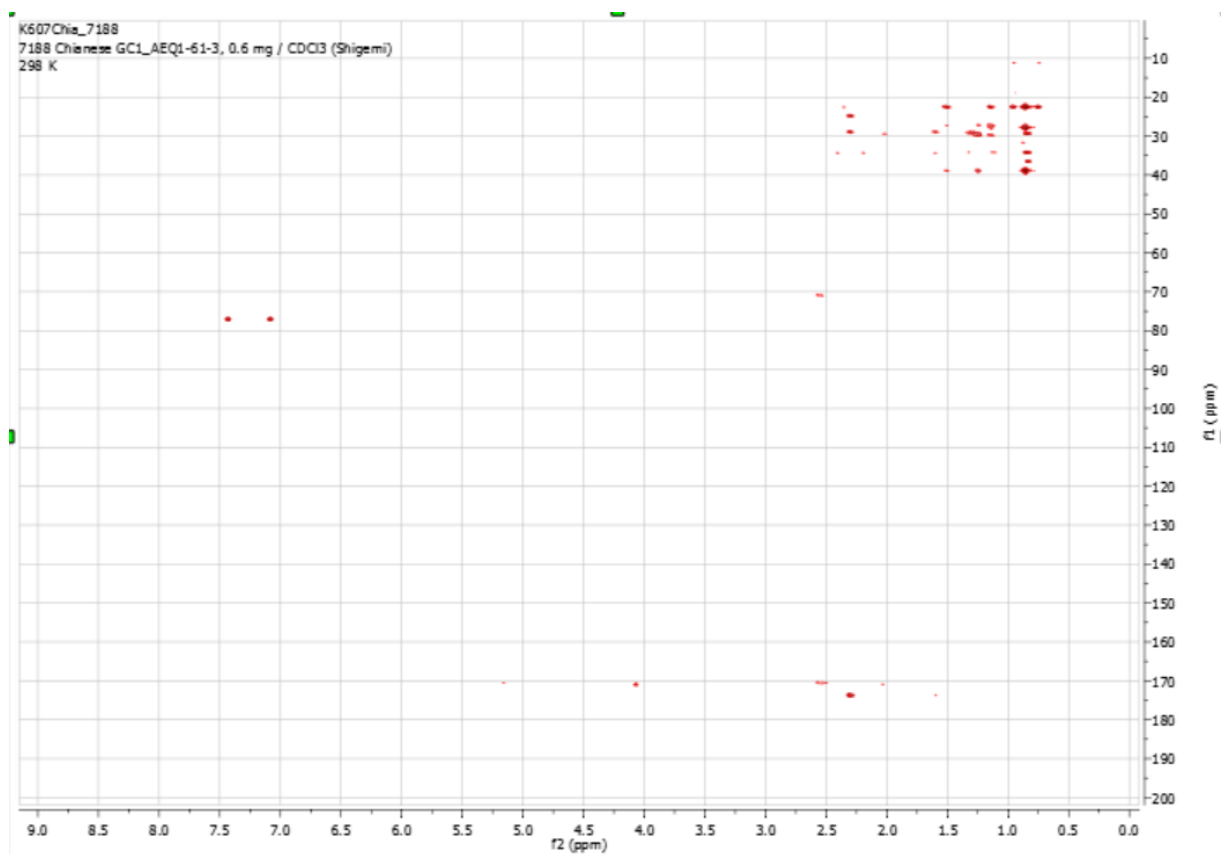

**Figure S4.** HSQC NMR (600 MHz, CDCl<sub>3</sub>) spectrum of compound **1**

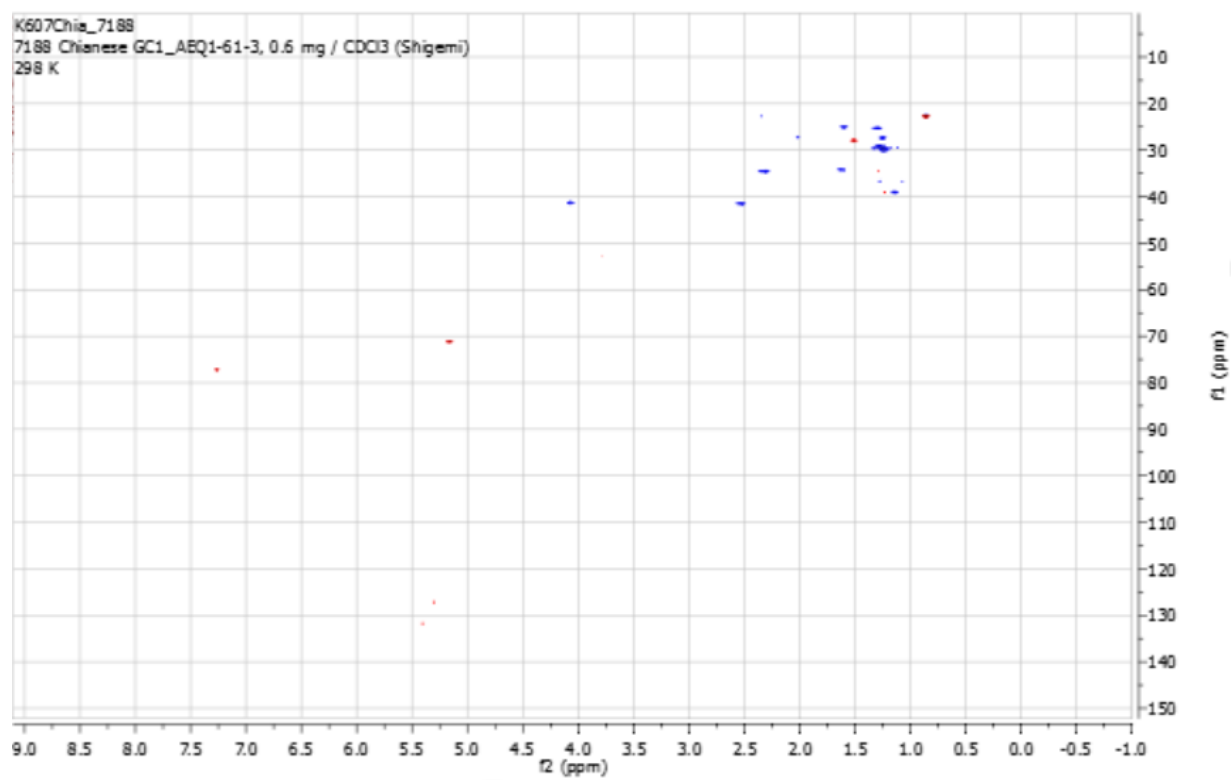

**Figure S5.** HRESIMS and MS/MS spectra in positive mode of compound **1**

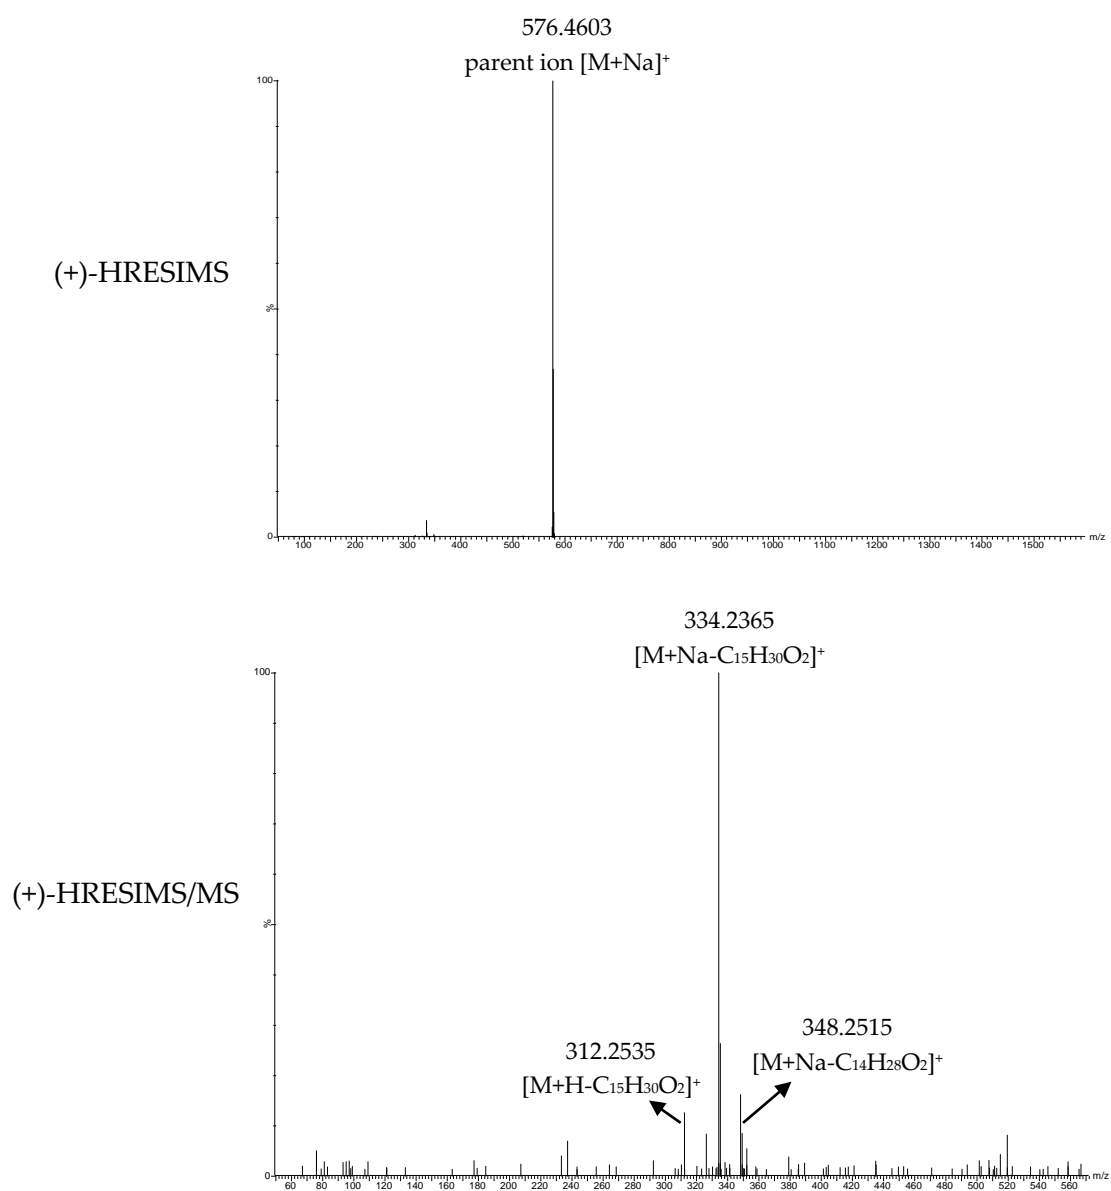



**Figure S8.** COSY NMR (600 MHz, CDCl<sub>3</sub>) spectrum of compound **2**

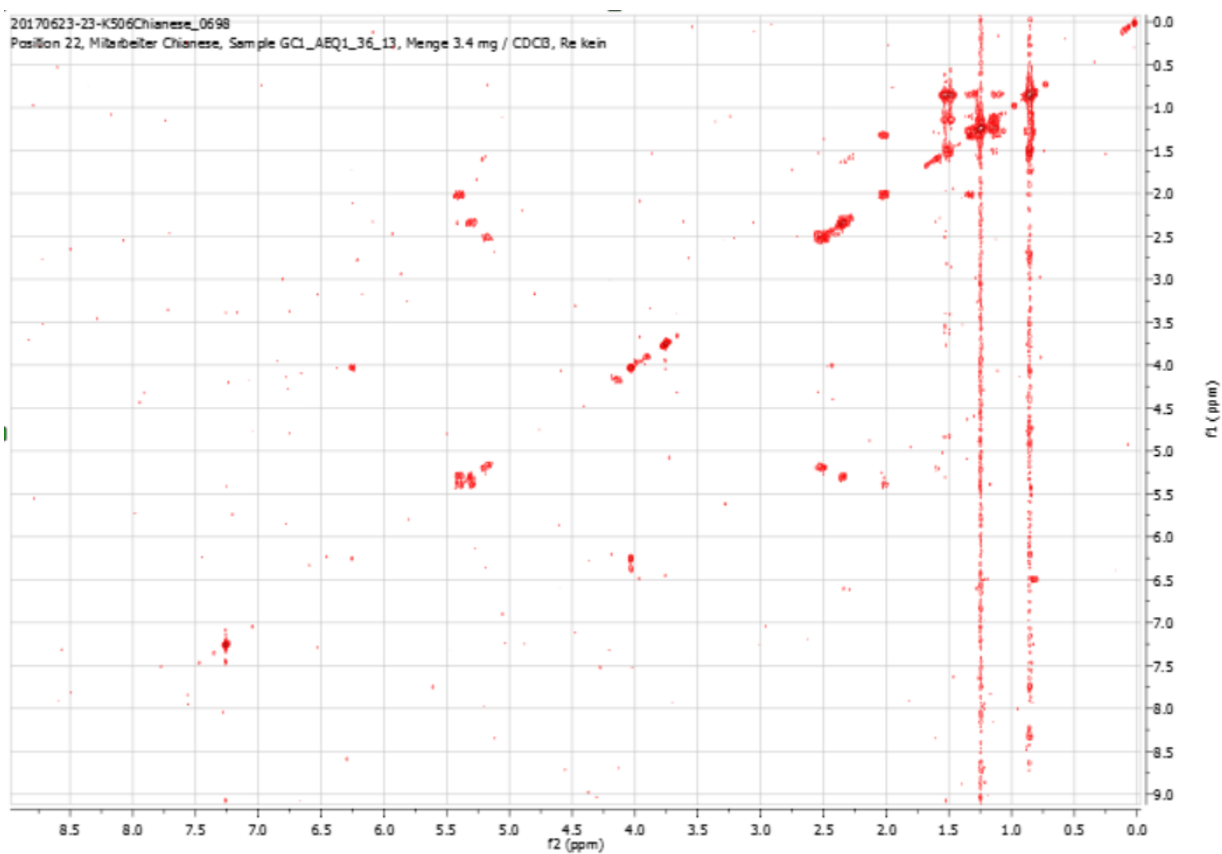

**Figure S9.** HMBC NMR (600 MHz, CDCl<sub>3</sub>) spectrum of compound **2**

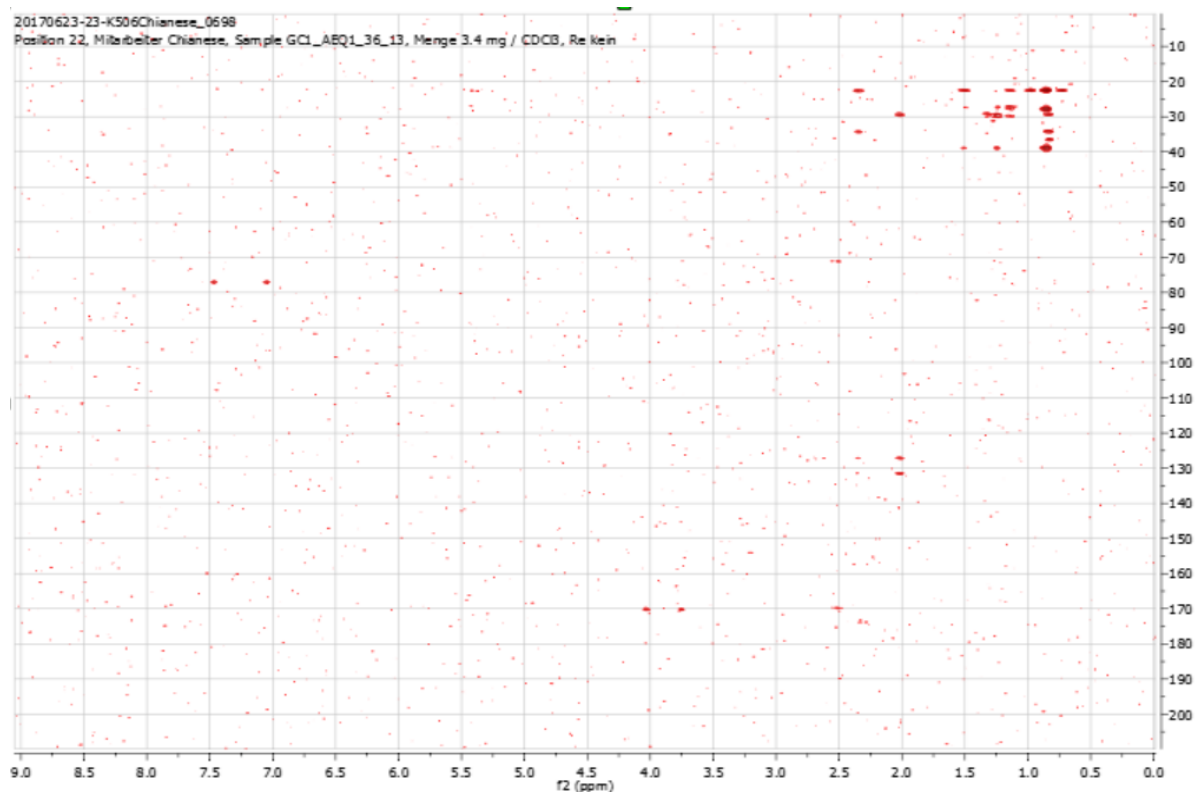

**Figure S10.** HSQC NMR (600 MHz, CDCl<sub>3</sub>) spectrum of compound **2**

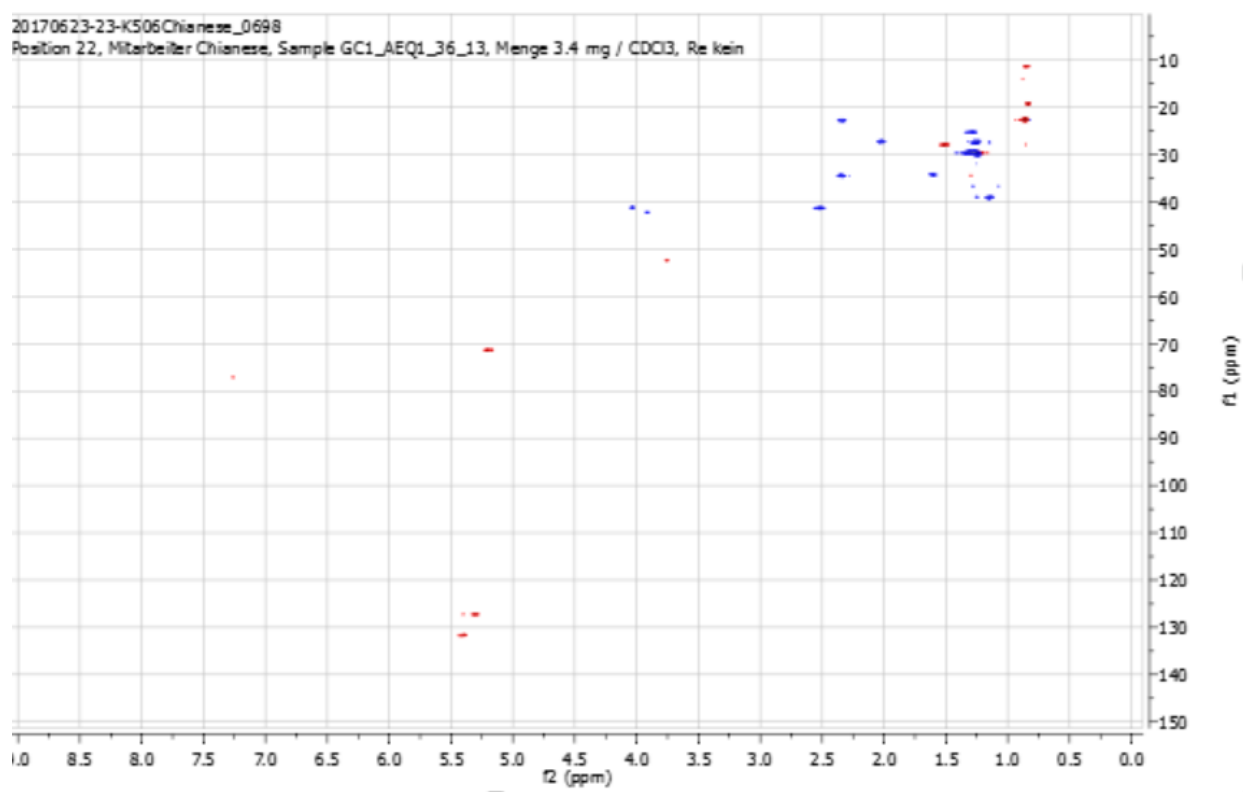

**Figure S11.** NOESY NMR (600 MHz, CDCl<sub>3</sub>) spectrum of compound **2**

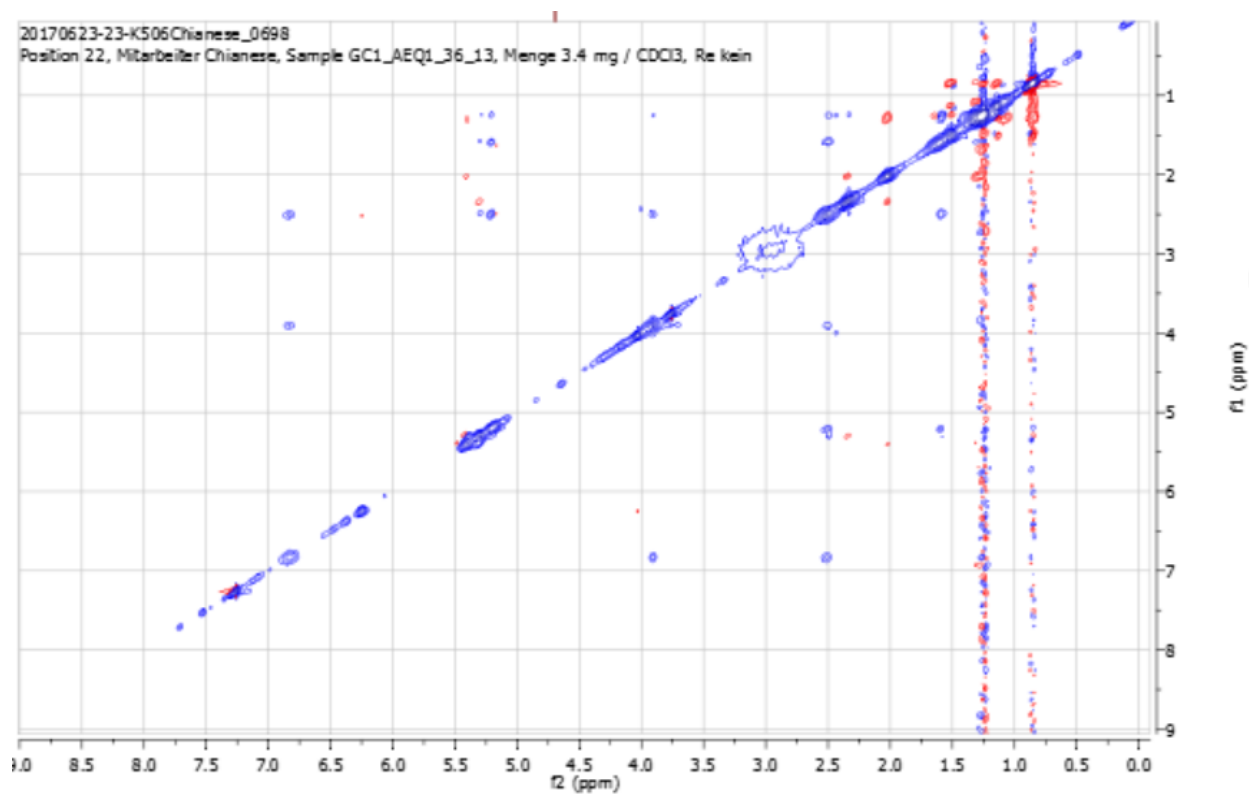



**Figure S12.** HRESIMS and MS/MS spectra in positive mode of compound **2**

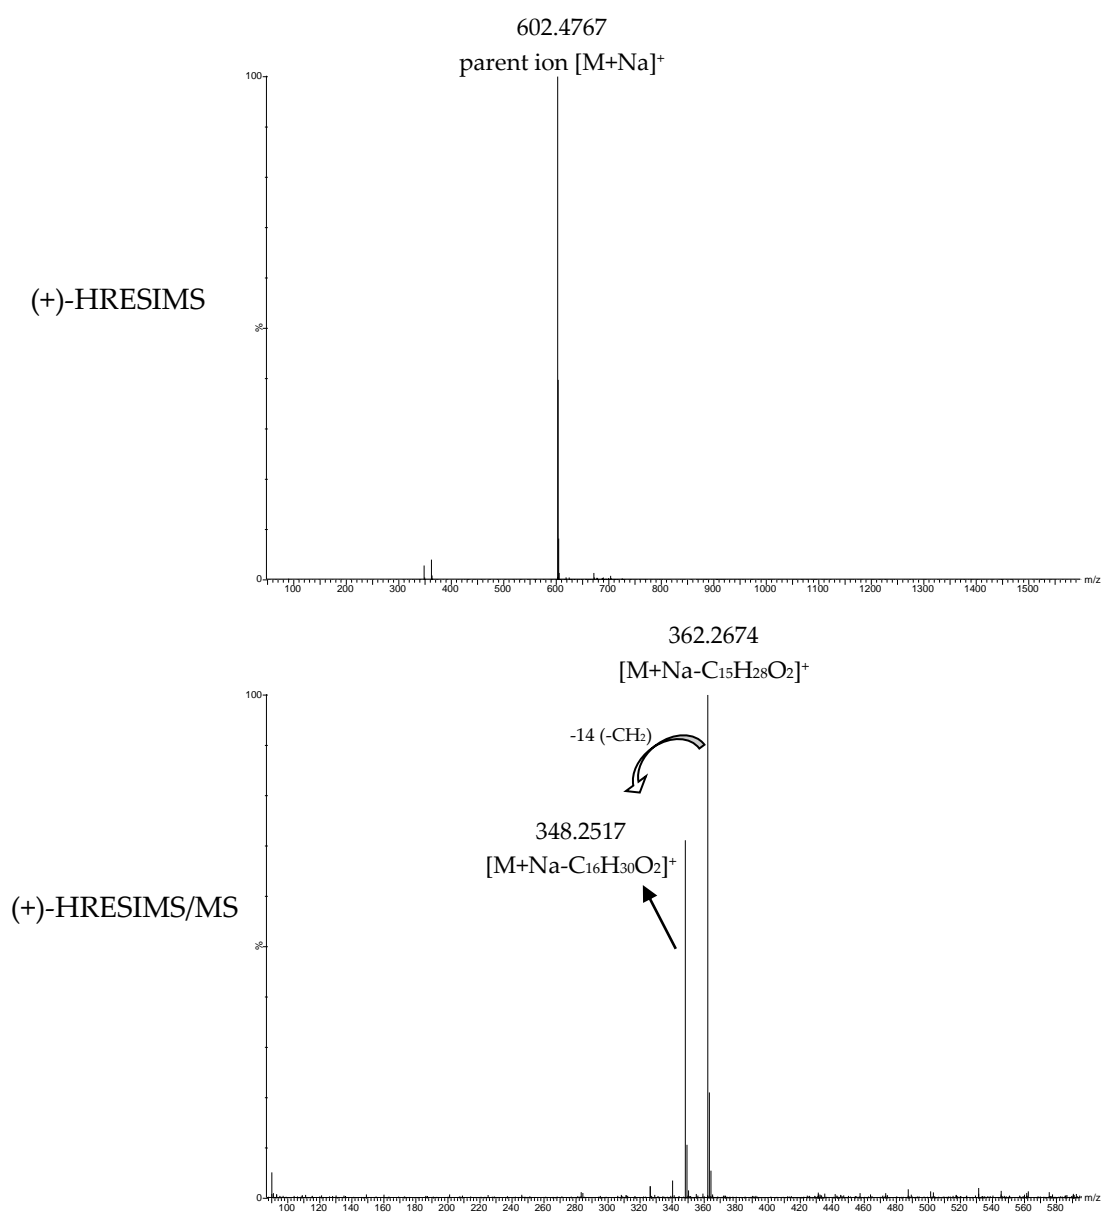

**Figure S13.**  $^1\text{H}$  NMR (600 MHz,  $\text{CDCl}_3$ ) spectrum of compound **3**

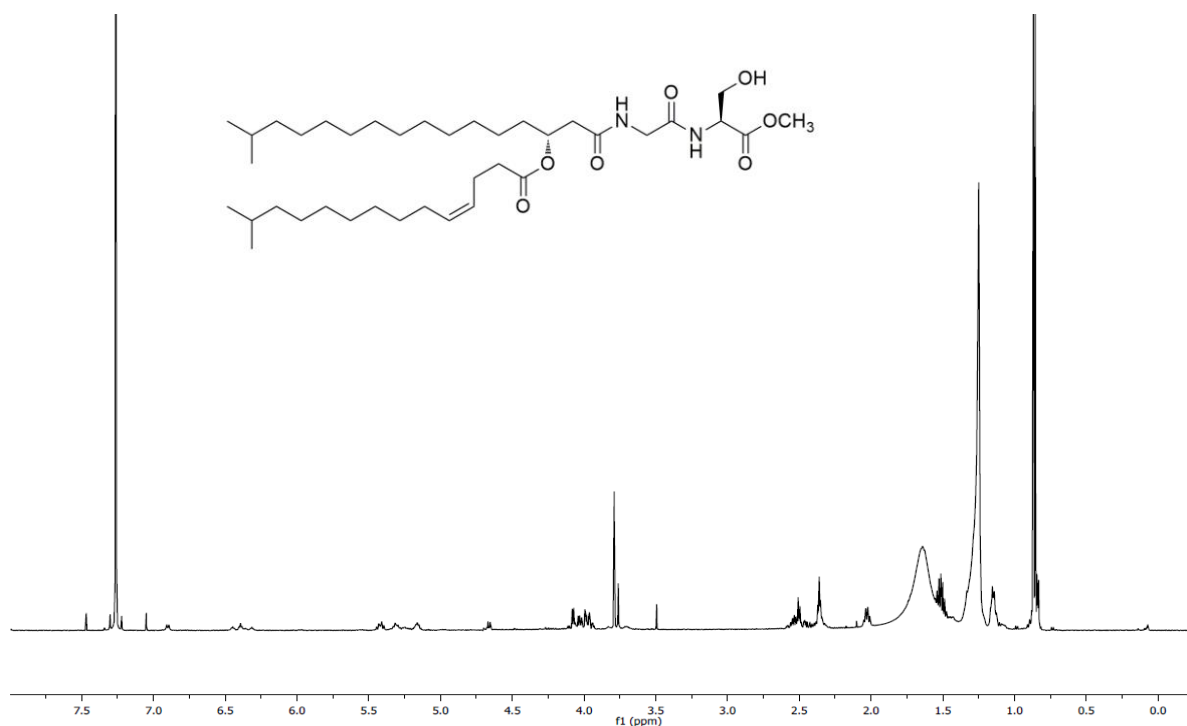

**Figure S14.**  $^{13}\text{C}$  NMR (150 MHz,  $\text{CDCl}_3$ ) spectrum of compound **3**

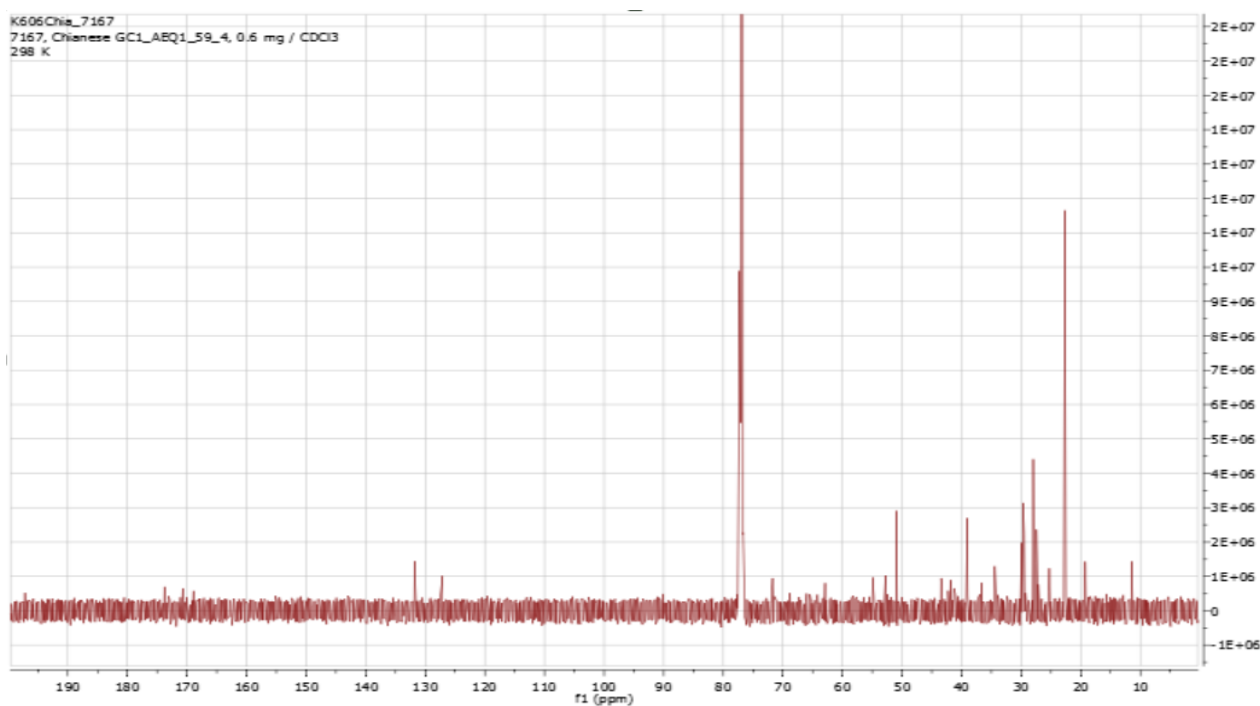

**Figure S15.** COSY NMR (600 MHz, CDCl<sub>3</sub>) spectrum of compound **3**

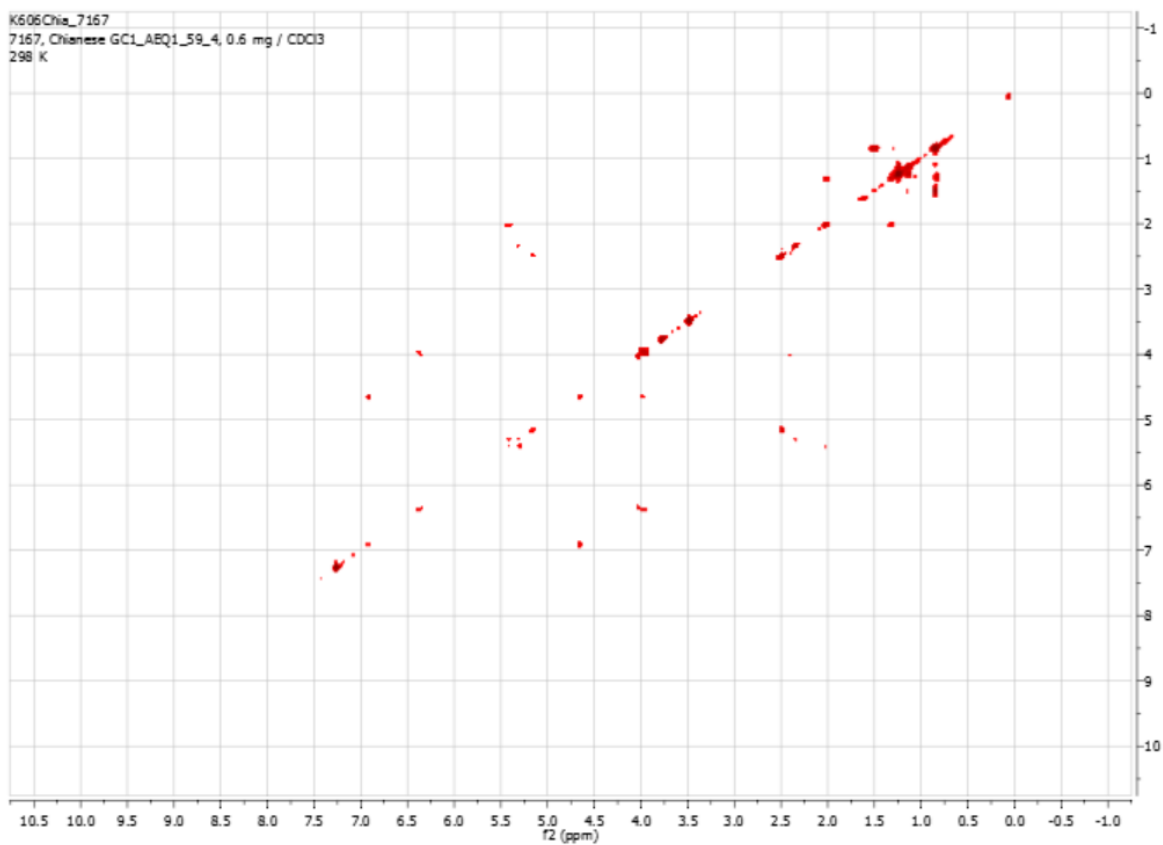

**Figure S16.** HMBC NMR (600 MHz, CDCl<sub>3</sub>) spectrum of compound **3**

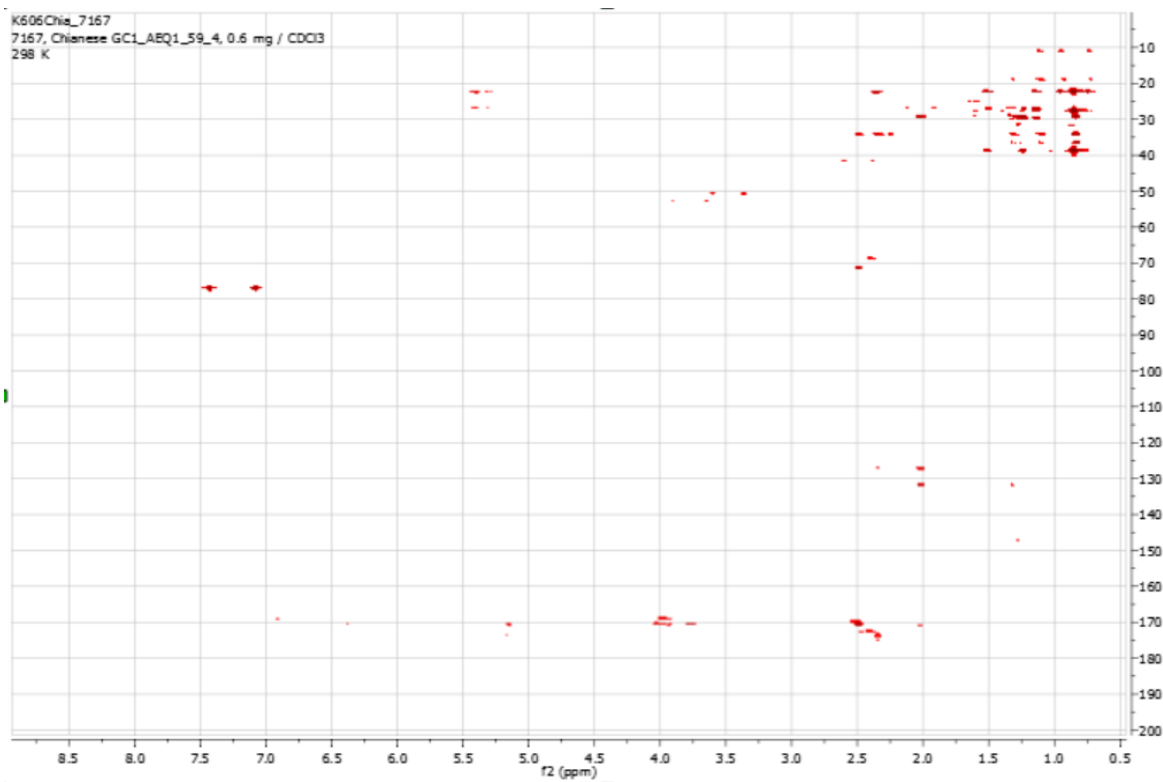

**Figure S17.** HSQC NMR (600 MHz, CDCl<sub>3</sub>) spectrum of compound **3**

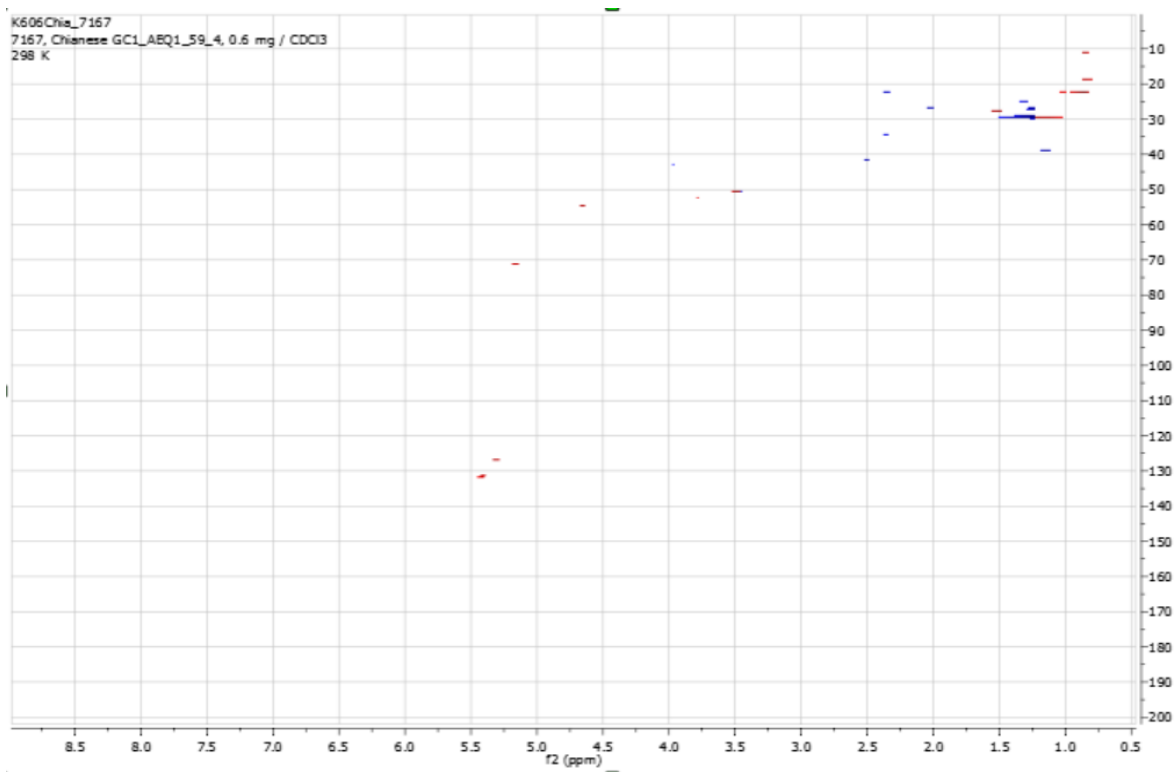

**Figure S18.** NOESY NMR (600 MHz, CDCl<sub>3</sub>) spectrum of compound **3**

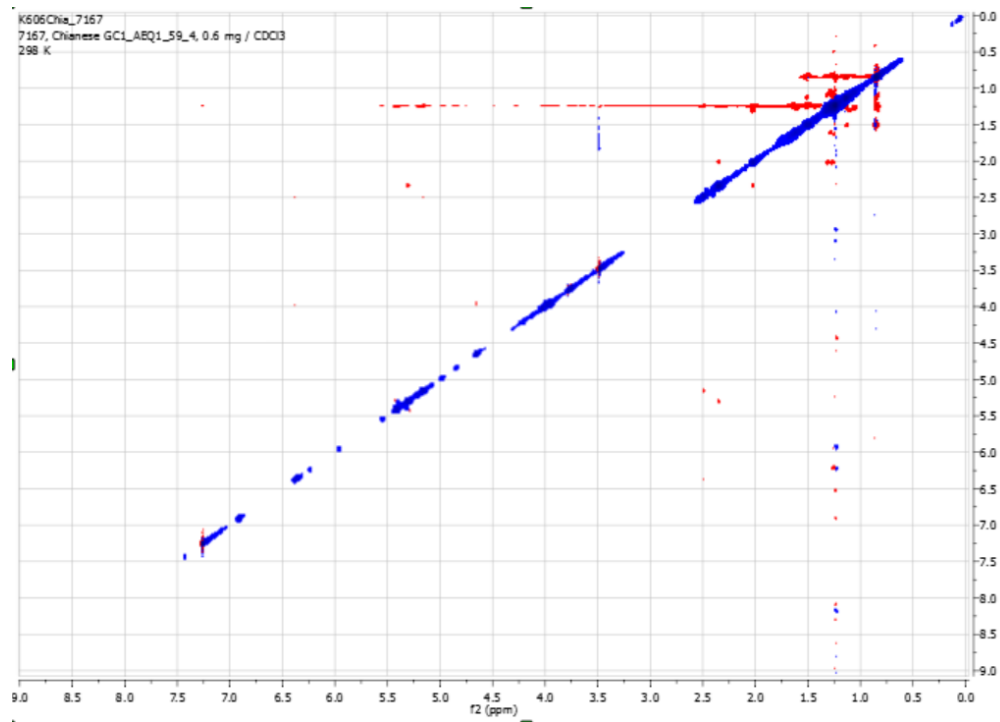

**Figure S19.** HRESIMS and MS/MS spectra in positive mode of compound **3**

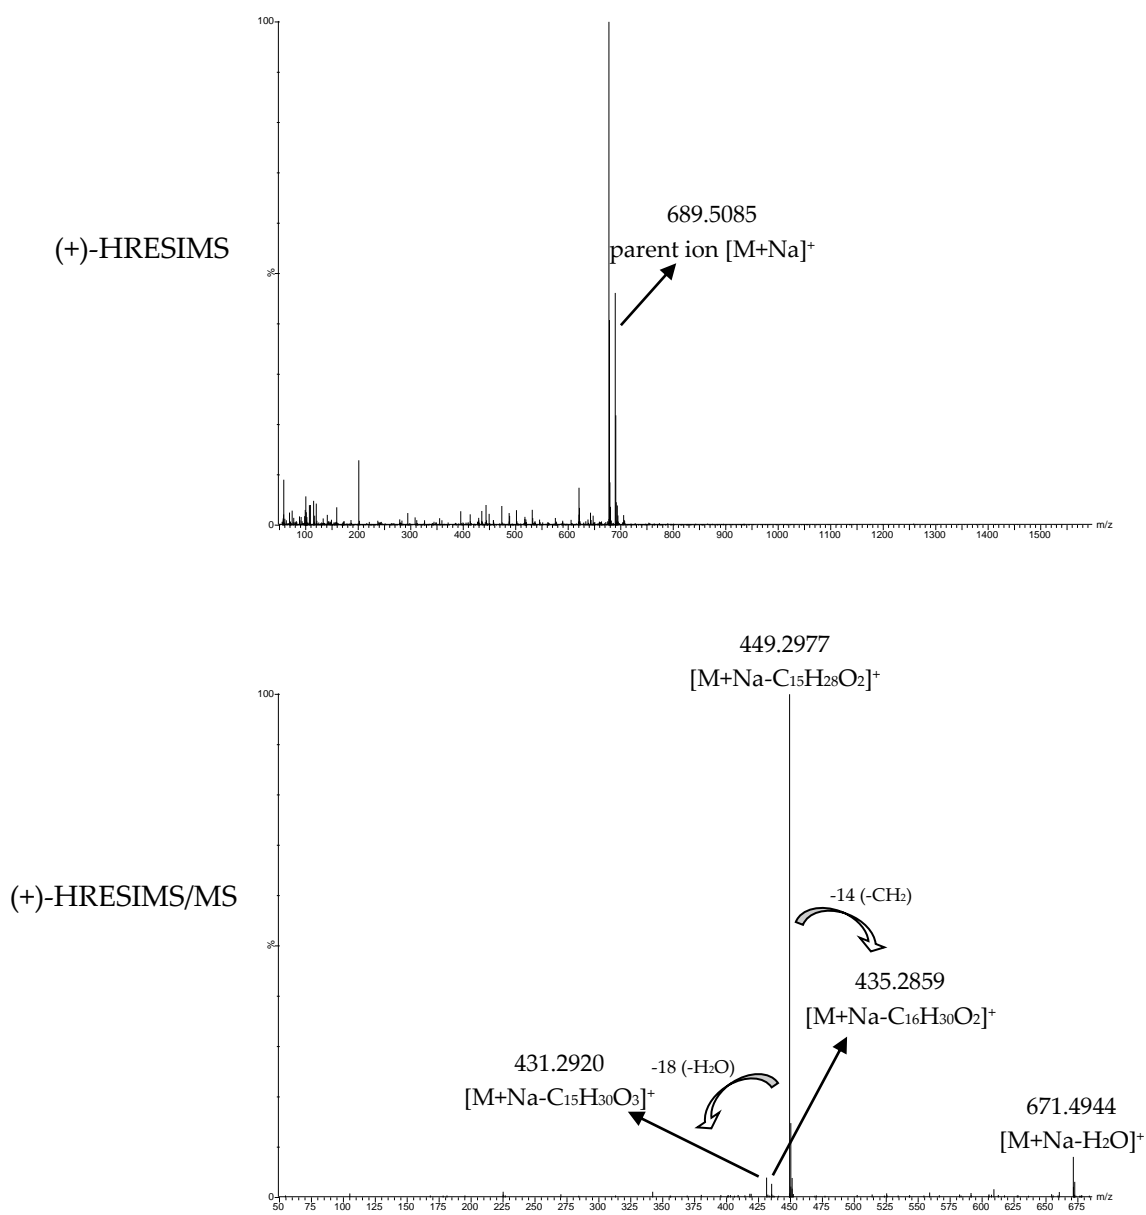

**Figure S20. Annotated HRESI-MS/MS spectra in positive mode of the known compounds 4-7**

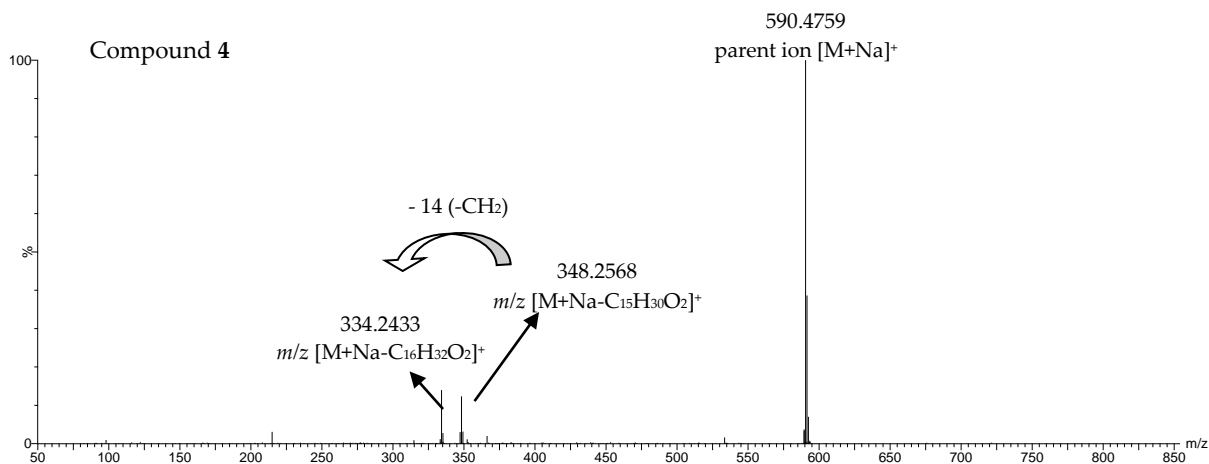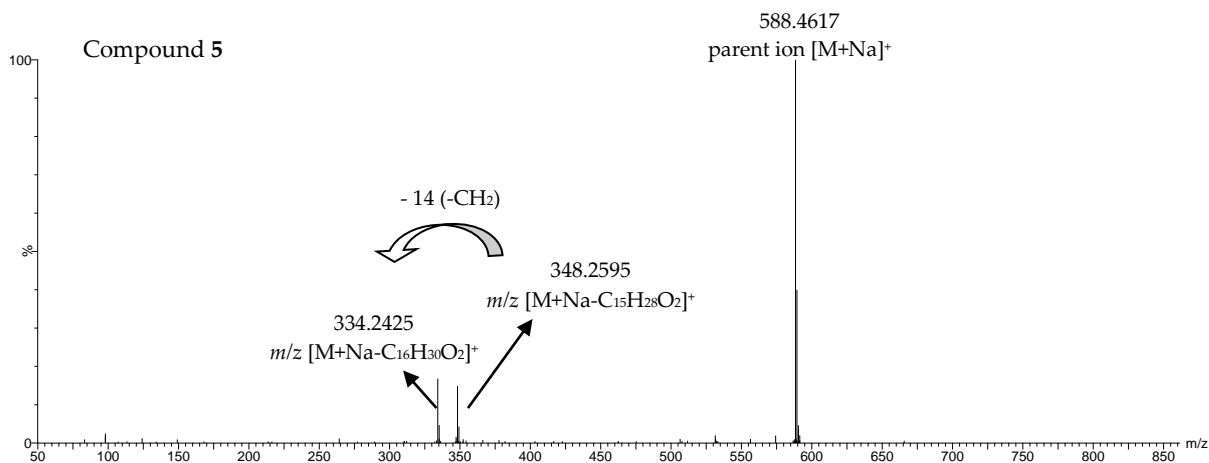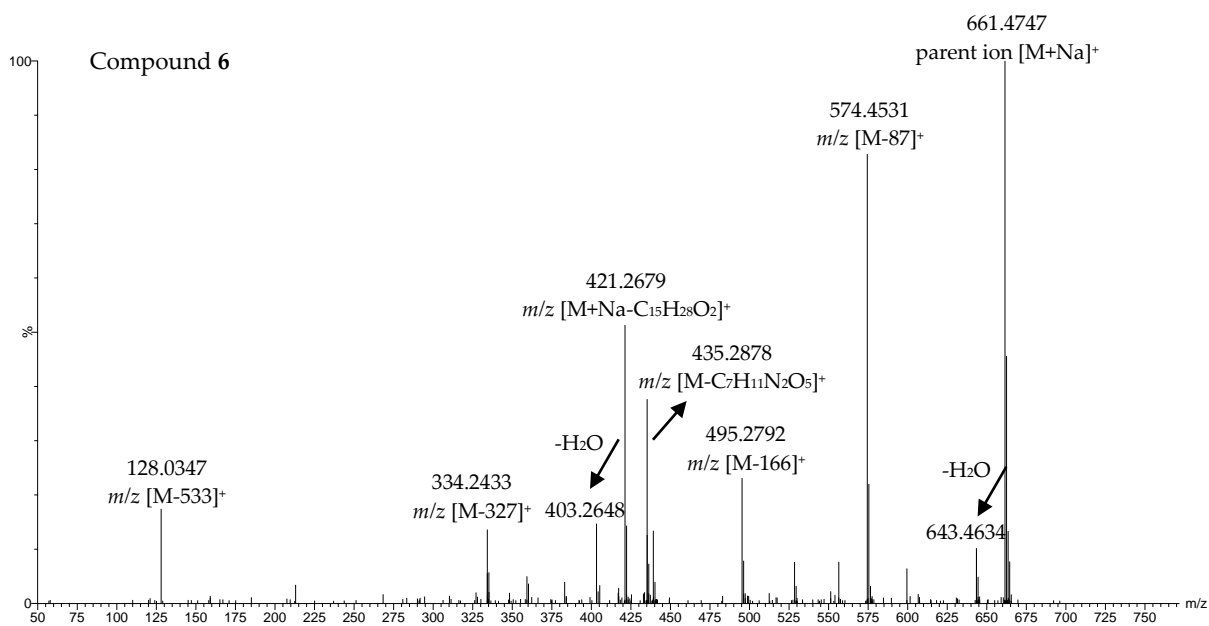

Compound 7

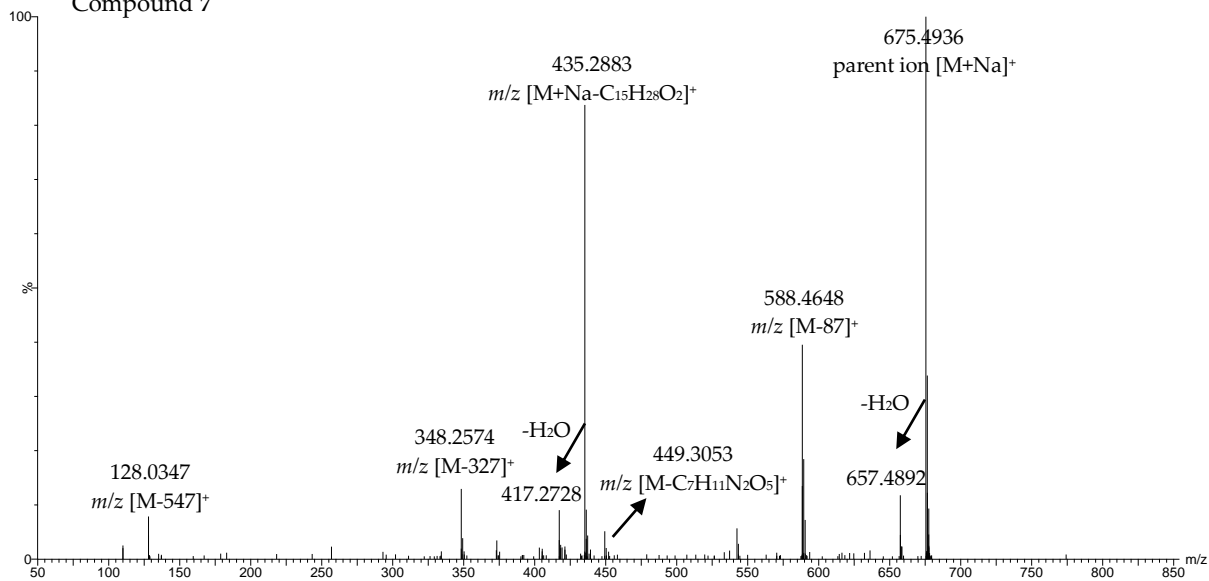

Supplement: marinedrugs-16-00187-s001.pdf [file marinedrugs-16-00187-s001.pdf]
